# Supplementary material for: Dynamic network biomarker identifies cdkn1a-mediated bone mineralization in the triggering phase of osteoporosis
Source: PubMed Central journal article supplement (PMC9898265; doi:10.1038/s12276-022-00915-9), 2023-01-04
Supplement: 12276_2022_915_MOESM1_ESM.pdf [file 12276_2022_915_MOESM1_ESM.pdf]

# 1 Supplementary information

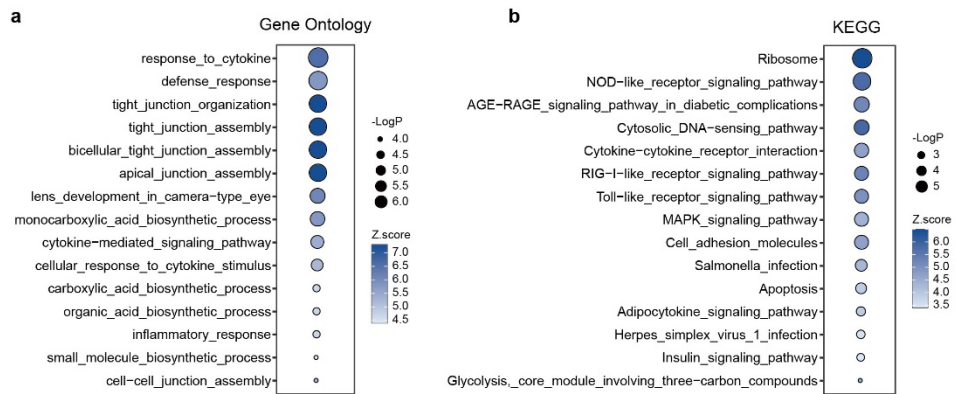

2

3 **Supplementary Fig. 1. Gene ontology (GO) and pathway enrichment analysis of**  
 4 **DNB genes. (a) GO terms enriched in the differentially expressed genes (DEGs). (b)**  
 5 **Kyoto Encyclopedia of Genes and Genomes (KEGG) pathways enriched in the DEGs.**

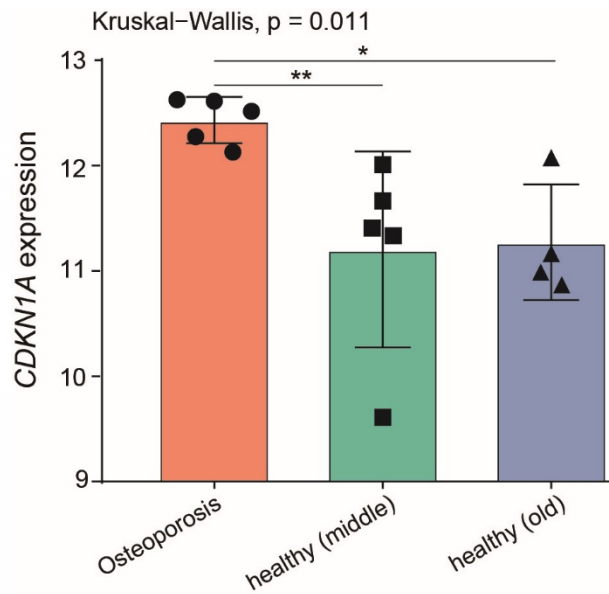

6

7 **Supplementary Fig. 2. Differentially expression analysis indicated that *CDKN1A***  
 8 **was remarkably upregulated in primary osteoporosis patients in contrast with**  
 9 **healthy donors with both middle and old ages.**

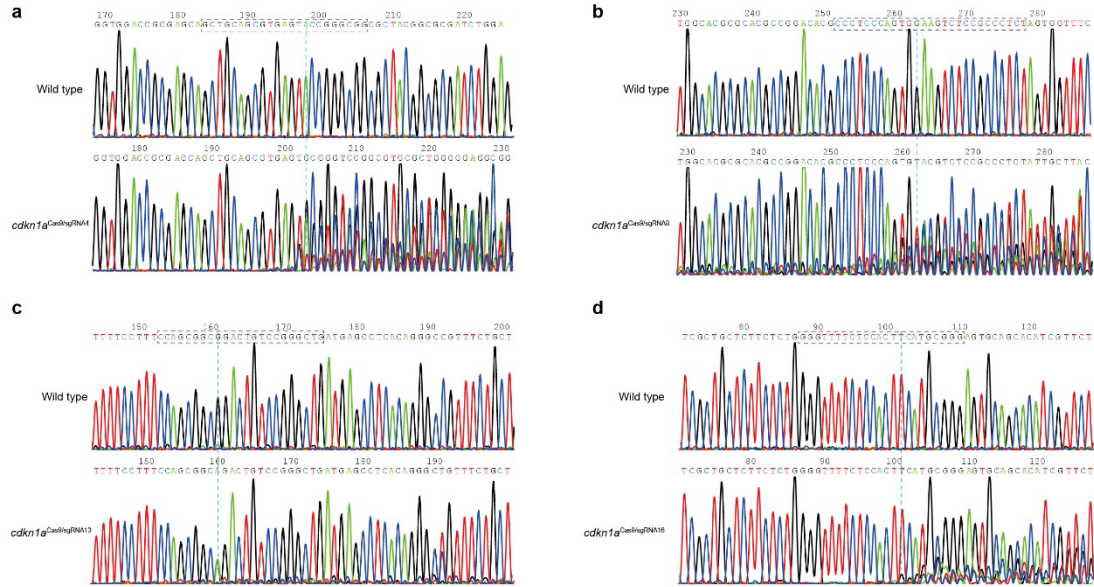

10

11 **Supplementary Fig. 3. Mutation of the target sites with the gRNAs was**  
 12 **confirmed by Sanger sequencing.** (a) Sequencing peaks for wild type (WT) and  
 13 *cdkn1a*<sup>Cas9/sgRNA4</sup> crisprants. (b) Sequencing peaks for WT and *cdkn1a*<sup>Cas9/sgRNA8</sup>  
 14 crisprants. (c) Sequencing peaks for WT and *cdkn1a*<sup>Cas9/sgRNA13</sup> crisprants. (d) Sequencing  
 15 peaks for WT and *cdkn1a*<sup>Cas9/sgRNA16</sup> crisprants. The black dotted box marks the target  
 16 sequence. The blue dotted line marks the start position of mutation.

17

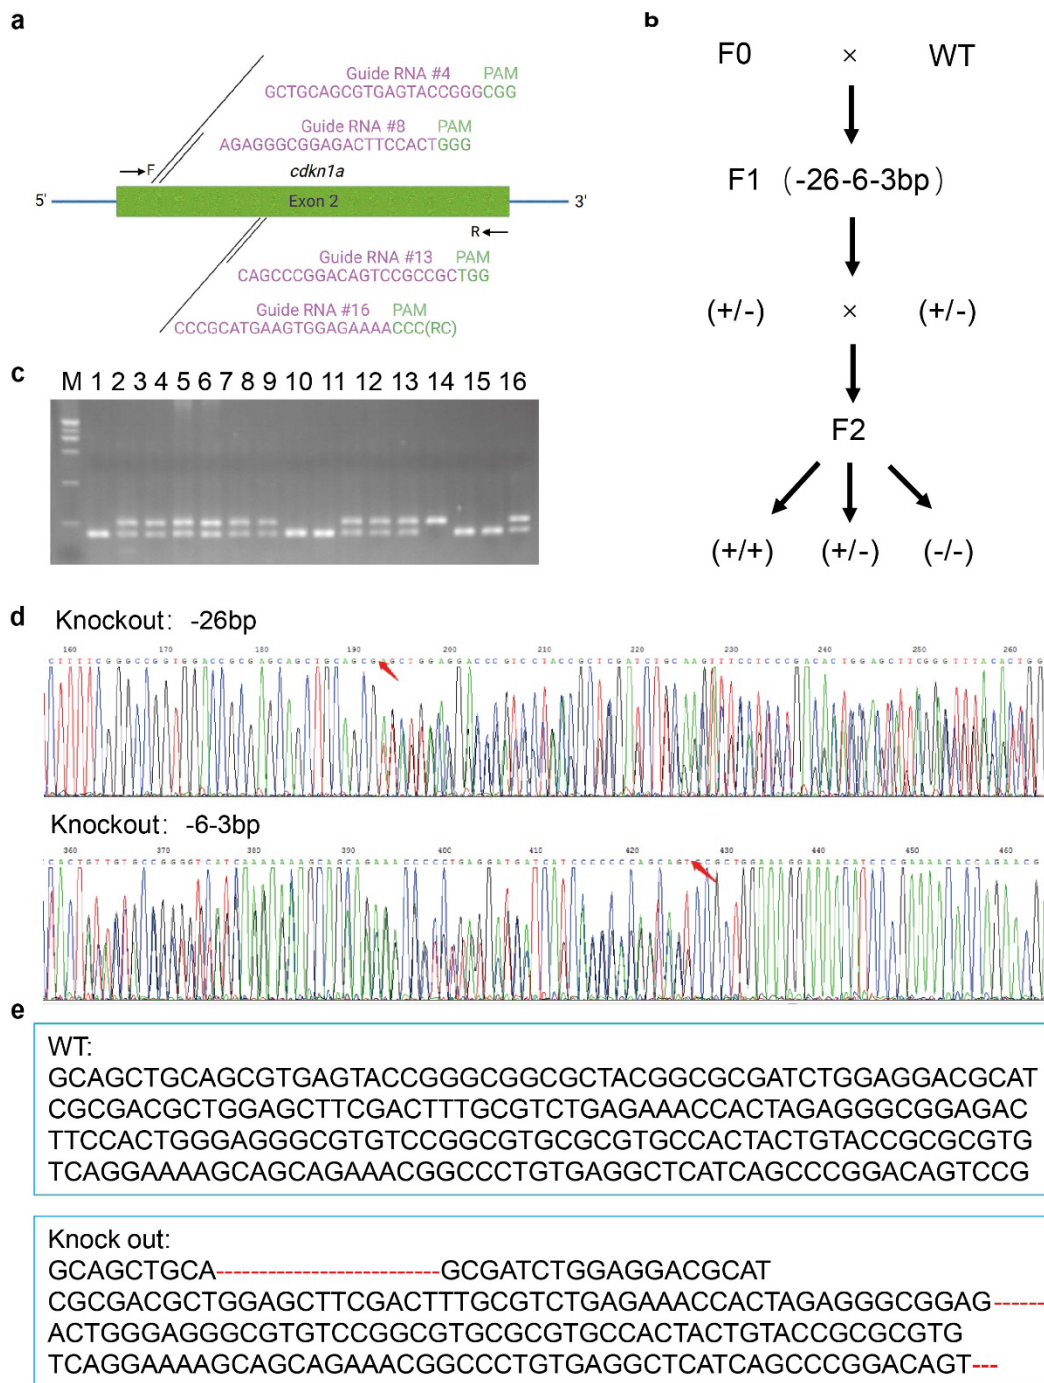

18

19 **Supplementary Fig. 4. Establishment of a homozygous knockout model of the**  
 20 **cdkn1a gene in zebrafish.** (a) The *cdkn1a* sgRNAs site in exon-2. (b) Diagram  
 21 detailing crossing scheme used to obtain a homozygous strain. (c) Gel electrophoresis  
 22 of PCR products of F1 mutant. (d) The F1 mutant sequencing result. The red arrow  
 23 indicates the starting point of the frameshift mutation. (e) Sequence alignment result.  
 24 The red strikethroughs indicate frameshift mutations.

25

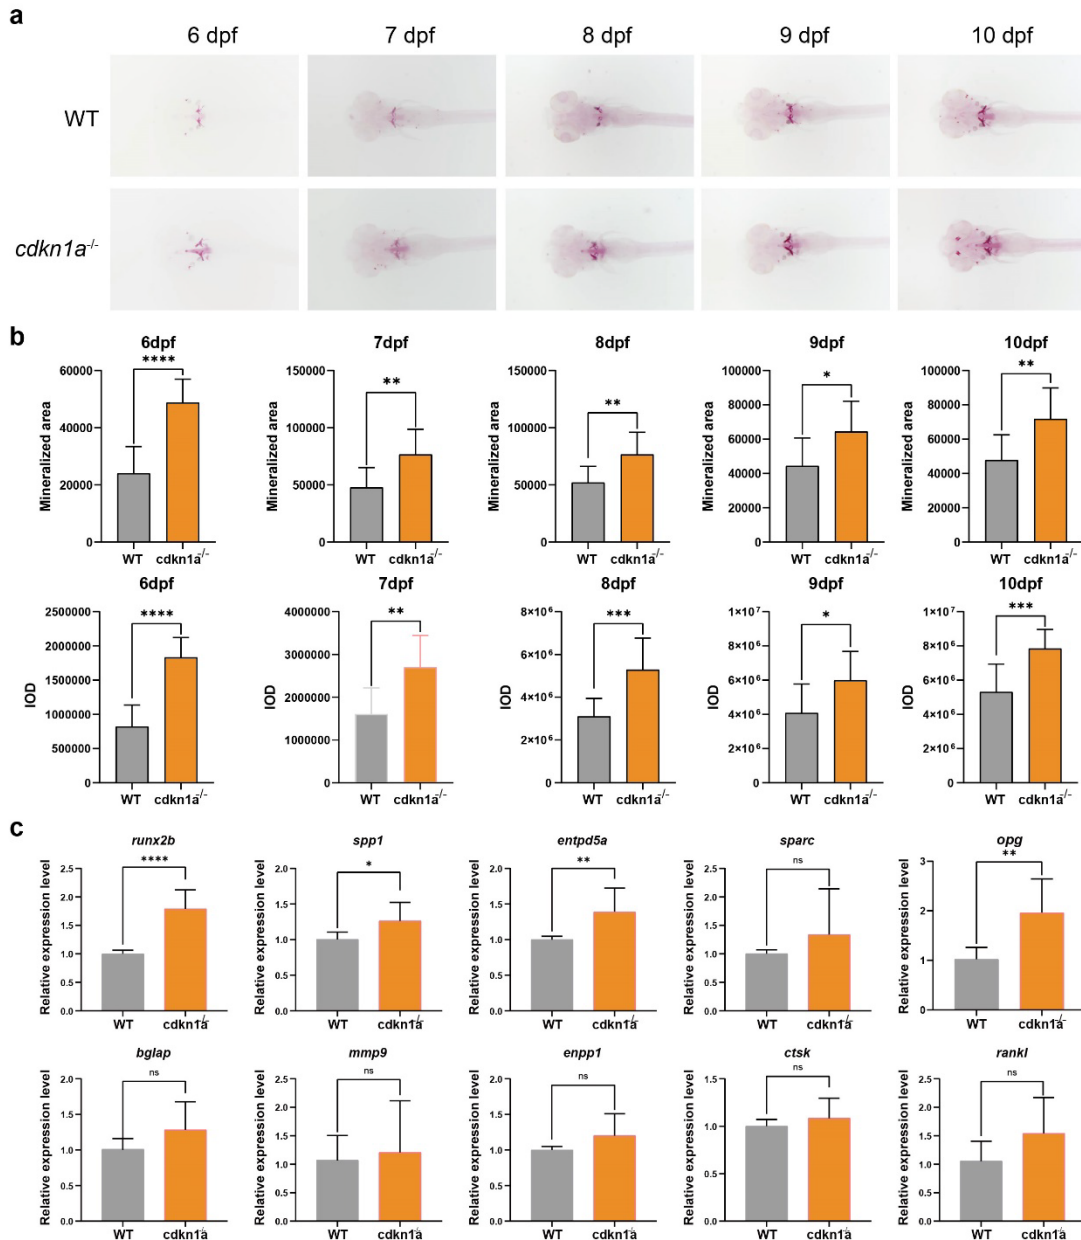

26

27 **Supplementary Fig. 5. The *cdkn1a*-mutant zebrafish larvae show increased bone**  
 28 **mineralization.** (a) Alizarin red staining evaluated the *cdkn1a*-mutant group on the  
 29 bone mineralization at 6, 7, 8, 9, and 10 days post-fertilization (dpf) compared to the  
 30 WT group. Scale bars: 1 mm. (b) Semiquantitative analysis of mineralization area and  
 31 IOD (n = 10). (c) mRNA expression levels of genes related to osteoblasts (*runx2b*, *spp1*,  
 32 *entpd5a*, *sparc*, *bglap*) and osteoclasts (*mmp9*, *enpp1*, *ctsk*, *rankl*, *opg*) in WT and  
 33 *cdkn1a*-mutant group (n = 20). \*P < 0.05, \*\*P < 0.01, \*\*\*P < 0.001, \*\*\*\*P < 0.0001,  
 34 Student's *t*-test.

35

36 **Supplementary Table 1. Exon 2 sequence of *cdkn1a*.**

```
ATGGCGGCGCACAAGCGGATCCTACGTTCACTCGGTAATGGGCCGACTAGGCGGA  
GTCTTTTCGGGCCGGTGGACCGCGAGCAGCTGCAGCGTGAGTACCGGGCGGCCTA  
CGGCGCGATCTGGAGGACGCATCGCGACGCTGGAGCTTCGACTTTGCGTCTGAGAA  
ACCACTAGAGGGCGGAGACTTCCACTGGGAGGGCGTGTCCGGCGTGCGCGTGCCA  
CTACTGTACCGCGCGTGTTCAGGAAAAGCAGCAGAAACGGCCCTGTGAGGCTCATC  
AGCCCGGACAGTCCGCCGCTGGAAAAGGAAAACATCCCGAAAACACCAGAACGATG  
TGCTGCACTCCCGCATGAAGTGGAGAAAACCCAGAGAAGAGCAGCGAGCTGAAG  
CGCAAACAGACCAACATCACAG
```

37

38 **Supplementary Table 2. *cdkn1a* RNA guides for CRISPR.**

| Guides   | Target sequence           | Reverse complement sequence |
|----------|---------------------------|-----------------------------|
| Guide 1  | ATCCTACGTTCACTCGGTAATGG   | CCATTACCGAGTGAACGTAGGAT     |
| Guide 2  | CGACTAGGCGGAGTCTTTTCGGG   | CCCGAAAAGACTCCGCCTAGTCG     |
| Guide 3  | TGCAGCTGCTCGCGGTCCACCGG   | CCGGTGGACCGCGAGCAGCTGCA     |
| Guide 4  | GCTGCAGCGTGAGTACCGGGCGG   | CCGCCCGGTACTCACGCTGCAGC     |
| Guide 5  | GGCGGCGCTACGGCGCGATCTGG   | CCGCCGCGATGCCGCGCTAGACC     |
| Guide 6  | TGGAGGACGCATCGCGACGCTGG   | CCAGCGTCGCGATGCGTCCTCCA     |
| Guide 7  | TGCGTCTGAGAAACCACTAGAGG   | CCTCTAGTGGTTTCTCAGACGCA     |
| Guide 8  | AGAGGGCGGAGACTTCCACTGGG   | CCCAGTGGAAGTCTCCGCCCTCT     |
| Guide 9  | CAGTAGTGGCACGCGCACGCCGG   | CCGGCGTGC GCGTGCCACTACTG    |
| Guide 10 | ACTACTGTACCGCGCGTGT CAGG  | CCTGACACGCGCGGTACAGTAGT     |
| Guide 11 | GCAGCAGAAACGGCCCTGTGAGG   | CCTCACAGGGCCGTTTCTGCTGC     |
| Guide 12 | TCCGGGCTGATGAGCCTCACAGG   | CCTGTGAGGCTCATCAGCCCGGA     |
| Guide 13 | CAGCCCGGACAGTCCGCCGCTGG   | CCAGCGGCGGACTGTCCGGGCTG     |
| Guide 14 | GATGTTTTCTTTCCAGCGGCGG    | CCGCCGCTGGAAAGGAAAACATC     |
| Guide 15 | CACATCGTTCTGGTGT TTTTCGGG | CCCGAAAACACCAGAACGATGTG     |
| Guide 16 | GGGTTTTCTCCACTTCATGCGGG   | CCCGCATGAAGTGGAGAAAACCC     |

39

40 **Supplementary Table 3. Primer sequences for the genes observed in qRT-PCR.**

| Gene           | Forward Primer (5'-3')  | Reverse Primer (5'-3')   |
|----------------|-------------------------|--------------------------|
| <i>β-actin</i> | ACGAACGACCAACCTAAACTCT  | TTAGACAACCTACCTCCCTTTGC  |
| <i>cdkn1a</i>  | CGCAAACAGACCAACATCAC    | CGGAATAAACGGTGTCTGTCT    |
| <i>runx2b</i>  | GAAGCGGAAGAGGGAAGAGC    | AATGGCTCTGTGGTAAGTGCC    |
| <i>sp7</i>     | TCCTCTCCCGCTTTTGGATT    | TCCCGAATTTGTTGCAGGTC     |
| <i>col2a1a</i> | GATGTGGAGATCAGAGCAGAGGG | CATGATGGGCAGTCTGGATGTCT  |
| <i>sparc</i>   | CCCTGCAAATACATCGCTCC    | TCTCGTAAATCTTCTTCACCCTG  |
| <i>mmp9</i>    | CAGAGAGGAAAAGGCAAGGTG   | AGGAATACATCATGTGAATCAATG |
| <i>mmp13</i>   | AGACCAGGACACACTCGCAGAG  | CTGCTGCATCTCCTTGAGCCT    |
| <i>acp5a</i>   | CCCCATAGAGACCGCTACAG    | ACATCAGTGACGCCCTTGTA     |
| <i>enpp1</i>   | TTGCAACCAACTCAGCTCTG    | CCCCTTTTACACAGTCTGC      |
| <i>sost</i>    | TACCAGAATACGCGGAGGAC    | AAGTCCGTGTGTTTGCTGAC     |
| <i>entpd5a</i> | CGCTACCGTGCAATCAATCA    | AAGACGCGACTGAAGTTGAC     |
| <i>bglap</i>   | TGAAGAGCCTGACAGTCCTG    | CACGCTTCACAAACACACCT     |
| <i>ctsk</i>    | CTATAAAGAGATTCTCAGGG    | ACACGGGTCCCACATTGG       |
| <i>rankl</i>   | CTCACCTTCCAATCAAGACGCC  | CTTTCATGCCATCCCAGGCTATCT |
| <i>opg</i>     | GTCAAACCGCTGGAACGCC     | CAGCAGATGCTCTTCCCCCTG    |

41



- 42 **Supplementary Table 4. (separate file)**
- 43 **7344 differentially expressed genes (DEGs).**

44 **Supplementary Table 5. (separate file)**

45 **The total genes of “osteoblast differentiation” and “osteoclast differentiation”.**
